# Supplementary material for: A highly selective CHEF-type chemosensor for monitoring Zn2+ in aqueous solution and living cells
Source: Royal Society of Chemistry journal article supplement (doi:10.1039/c5ra05080d), 2015-01-01
Supplement: c5ra05080d1.pdf [file c5ra05080d1.pdf]

**A highly selective CHEF-type chemosensor for monitoring Zn<sup>2+</sup> in aqueous solution and living cells**

Jae Jun Lee,<sup>a</sup> Seul Ah Lee,<sup>a</sup> Hyun Kim,<sup>a</sup> LeTuyen Nguyen,<sup>b</sup> Insup Noh,<sup>b</sup> Cheal Kim<sup>a\*</sup>

*<sup>a</sup>Department of Fine Chemistry and Department of Interdisciplinary Bio IT Materials, Seoul National University of Science and Technology, Seoul 139-743, Republic of Korea. Fax: +82-2-973-9149; Tel: +82-2-970-6693; E-mail: [chealkim@seoultech.ac.kr](mailto:chealkim@seoultech.ac.kr)*

*<sup>b</sup>Department of Chemical and Biomolecular Engineering, and Convergence Program of Biomedical Engineering and Biomaterials, Seoul National University of Science & Technology, Seoul 139-743, Republic of Korea.*

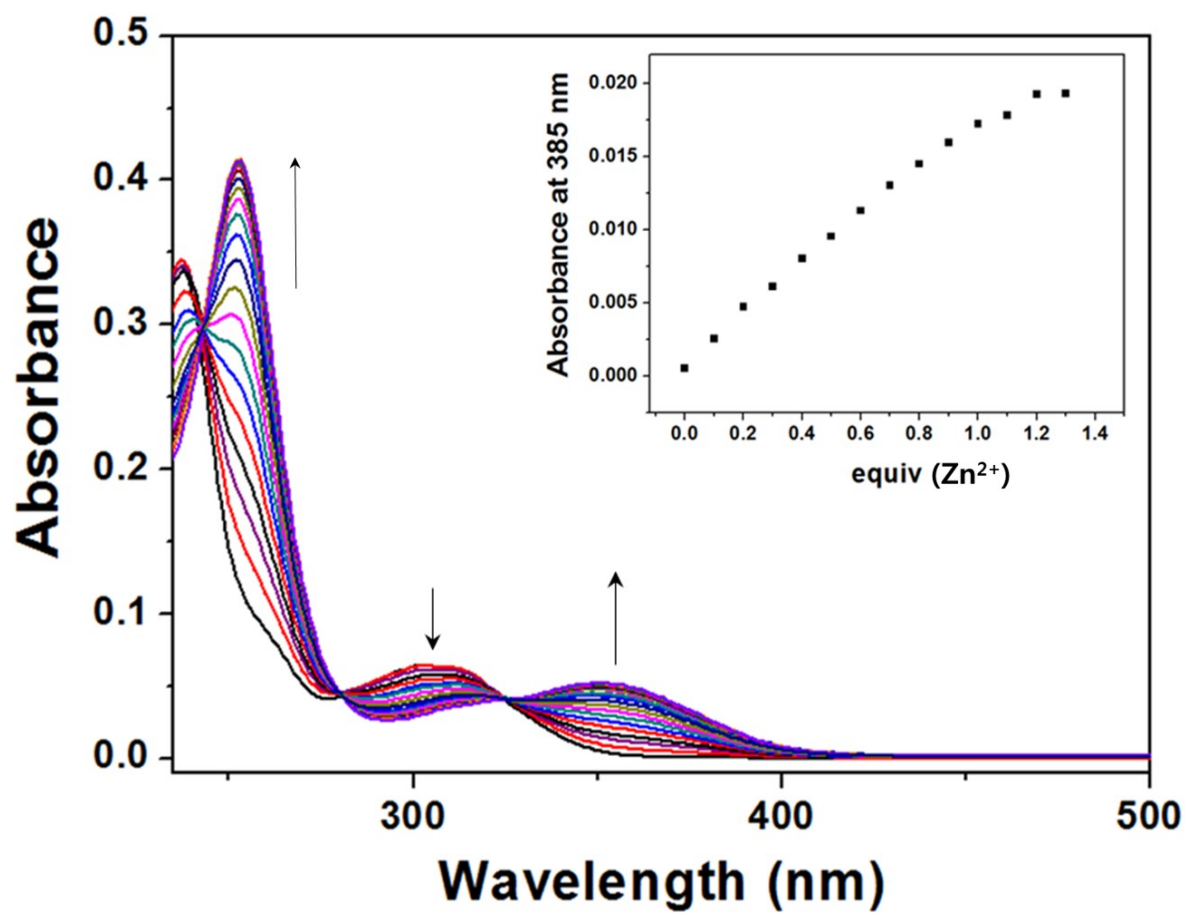

**Fig. S1** UV-vis absorption spectra of **1** (10 μM) obtained during the titration with Zn(NO<sub>3</sub>)<sub>2</sub> (0.1-1.5 equiv) in bis-tris buffer solution at room temperature.

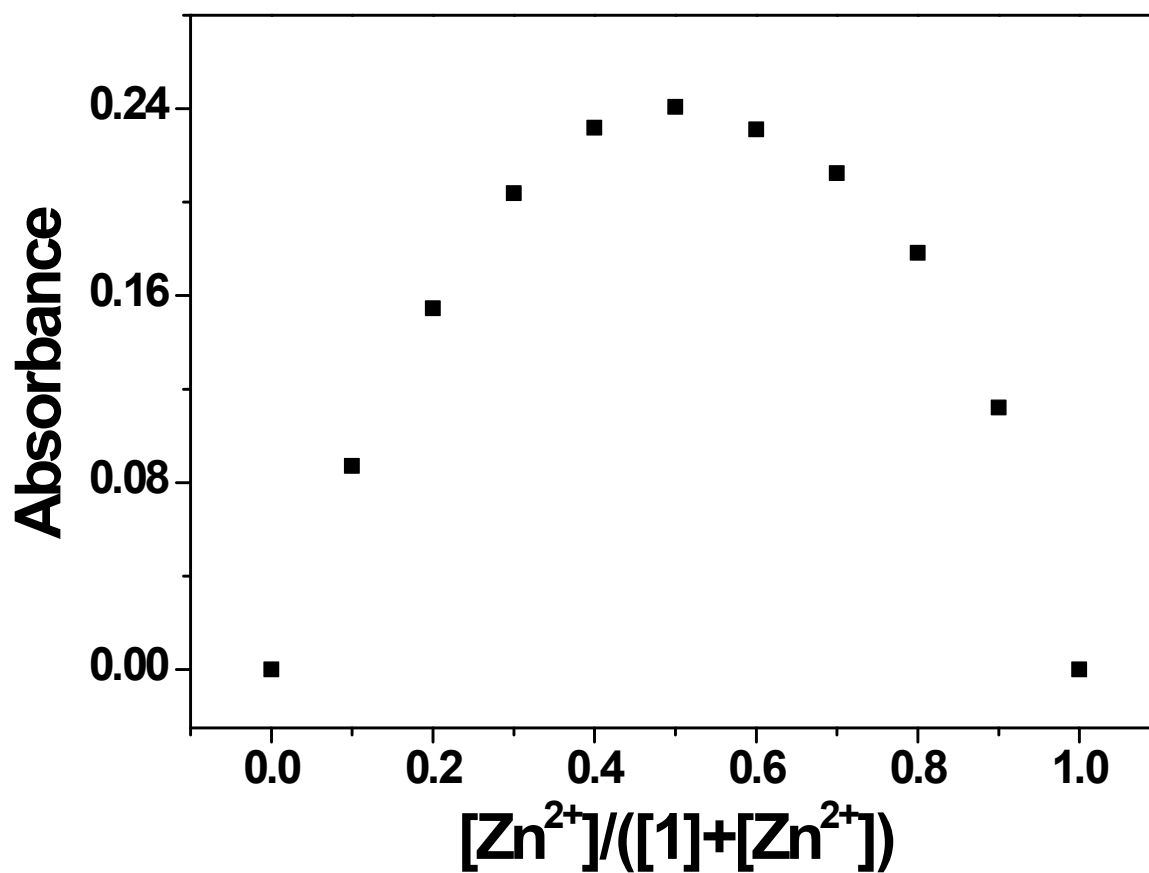

**Fig. S2** Job plot for the binding of **1** with  $Zn^{2+}$ . Absorbance at 312 nm was plotted as a function of the molar ratio  $[Zn^{2+}]/([1] + [Zn^{2+}])$ . The total concentration of zinc ions with receptor **1** was  $4.0 \times 10^{-5}M$ .

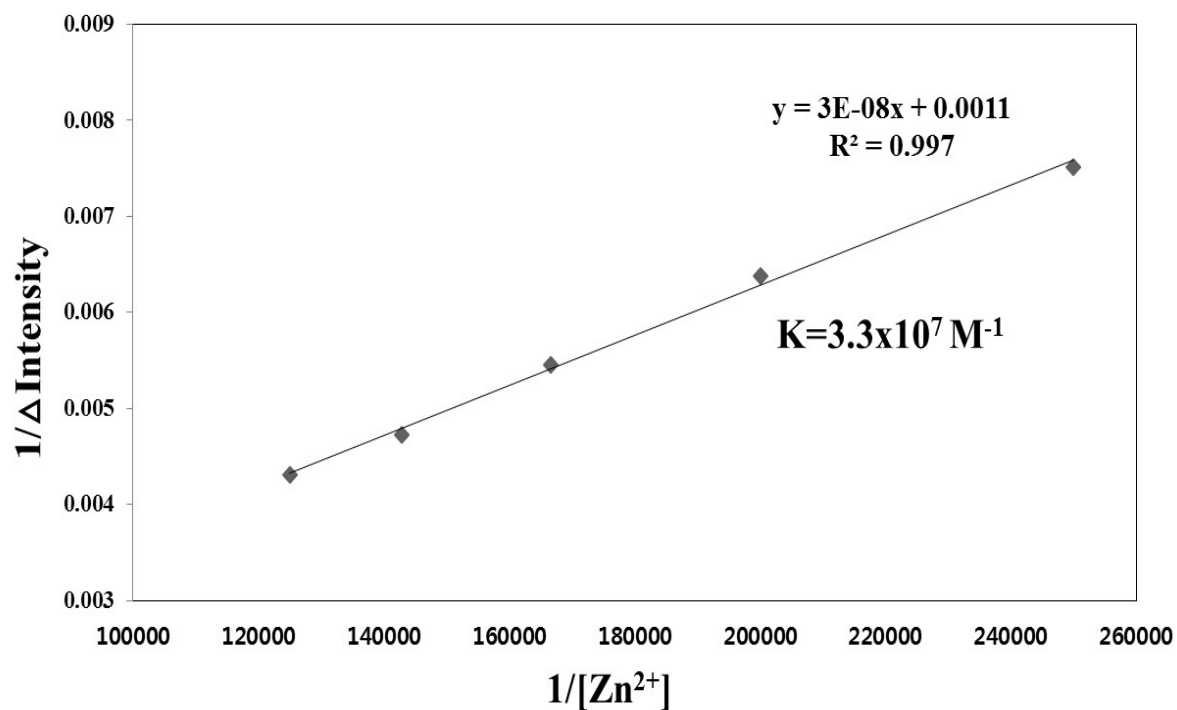

**Fig. S3** Benesi-Hildebrand equation plot (fluorescence intensity at 521 nm) of **1**, assuming 1:1 stoichiometry for association between **1** and  $\text{Zn}^{2+}$ .

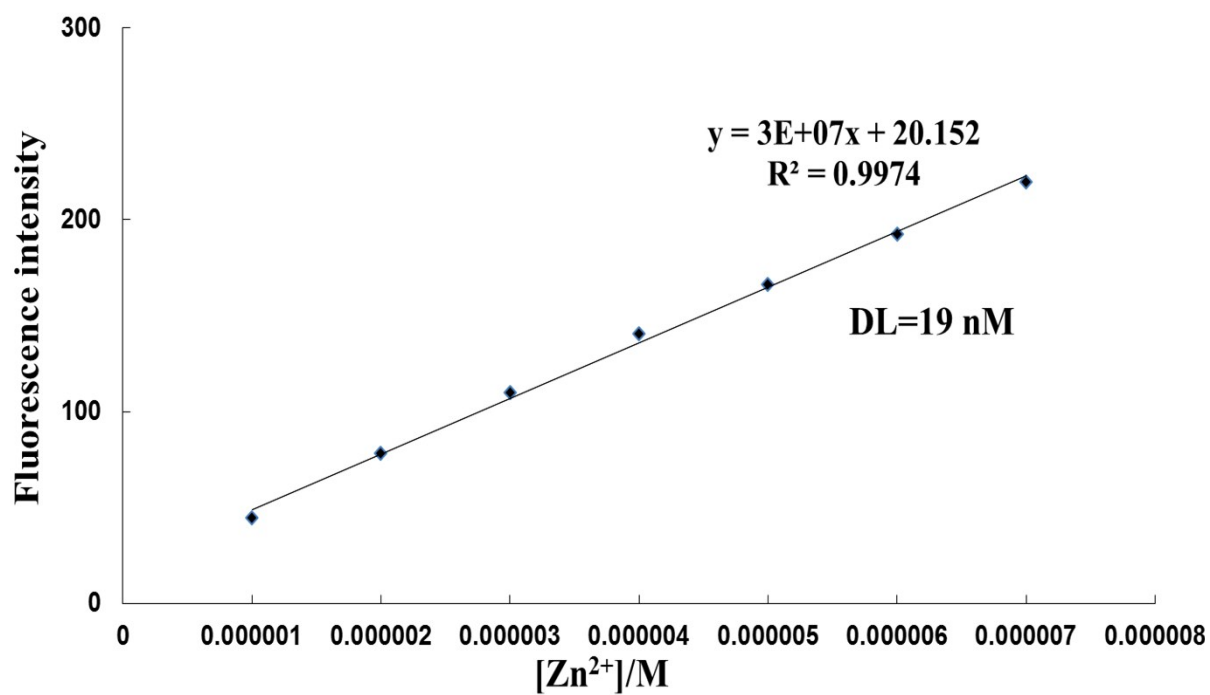

**Fig. S4** Determination of the detection limit based on change in the ratio (fluorescence intensity at 521 nm) of **1** (10  $\mu$ M) with Zn<sup>2+</sup>.

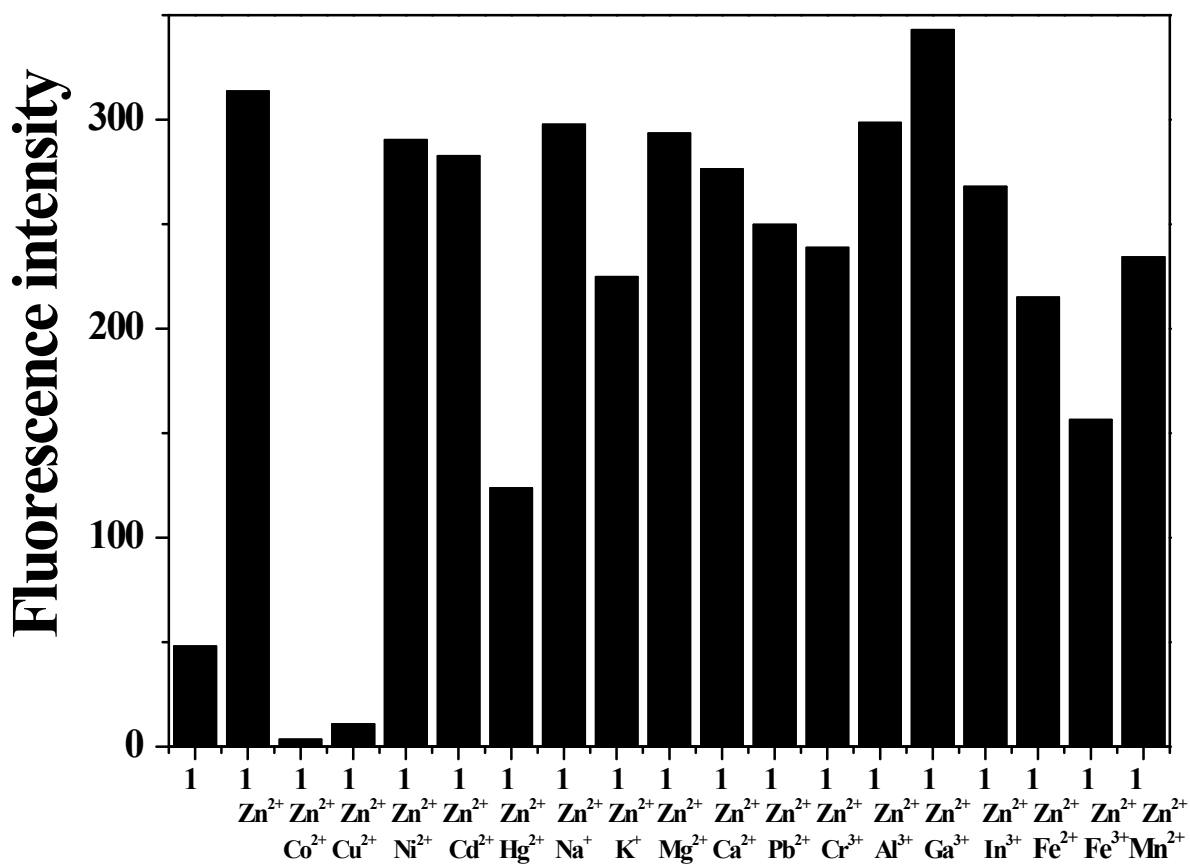

**Fig. S5** Competitive selectivity of **1** (10  $\mu\text{M}$ ) toward  $\text{Zn}^{2+}$  (1.5 equiv) in the presence of other metal ions (15 equiv) with an excitation of 355 nm in buffer solution (10 mM bis-tris, pH 7.0).

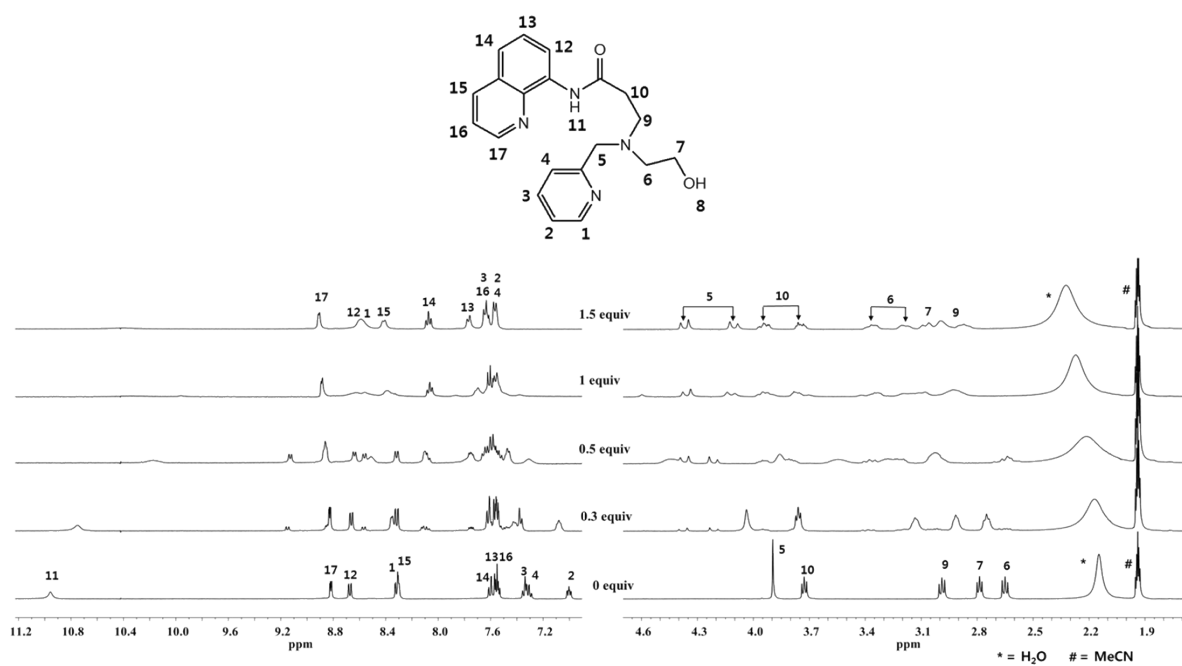

**Fig. S6**  $^1\text{H}$  NMR titration of **1** with  $\text{Zn}(\text{NO}_3)_2$  in  $\text{CD}_3\text{CN}$ .

(a)

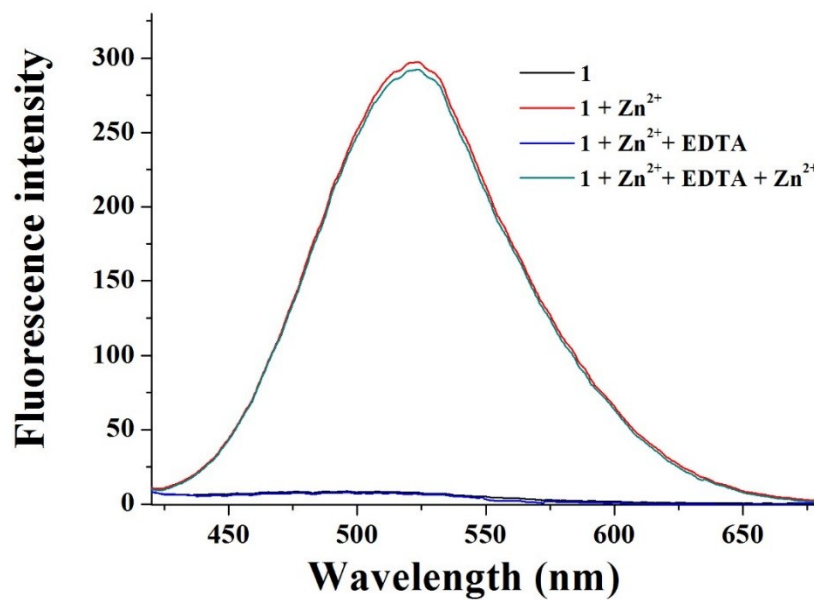

(b)

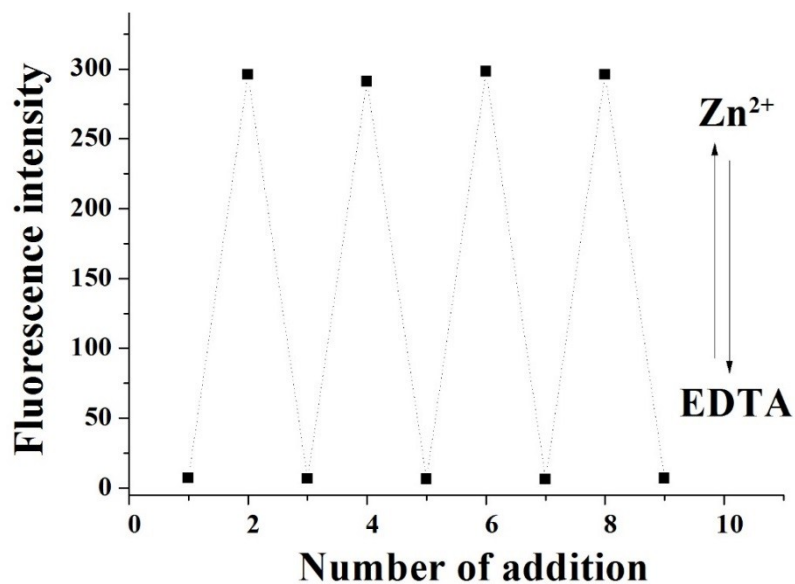

**Fig. S7** (a) Fluorescence spectral changes of **1** (10 μM) after the sequential addition of Zn<sup>2+</sup> and EDTA in buffer solution (10 mM bis-tris, pH 7.0). (b) Reversible changes in fluorescence



intensity of **1** (10  $\mu\text{M}$ ) at 521 nm after the sequential addition of  $\text{Zn}^{2+}$  and EDTA.

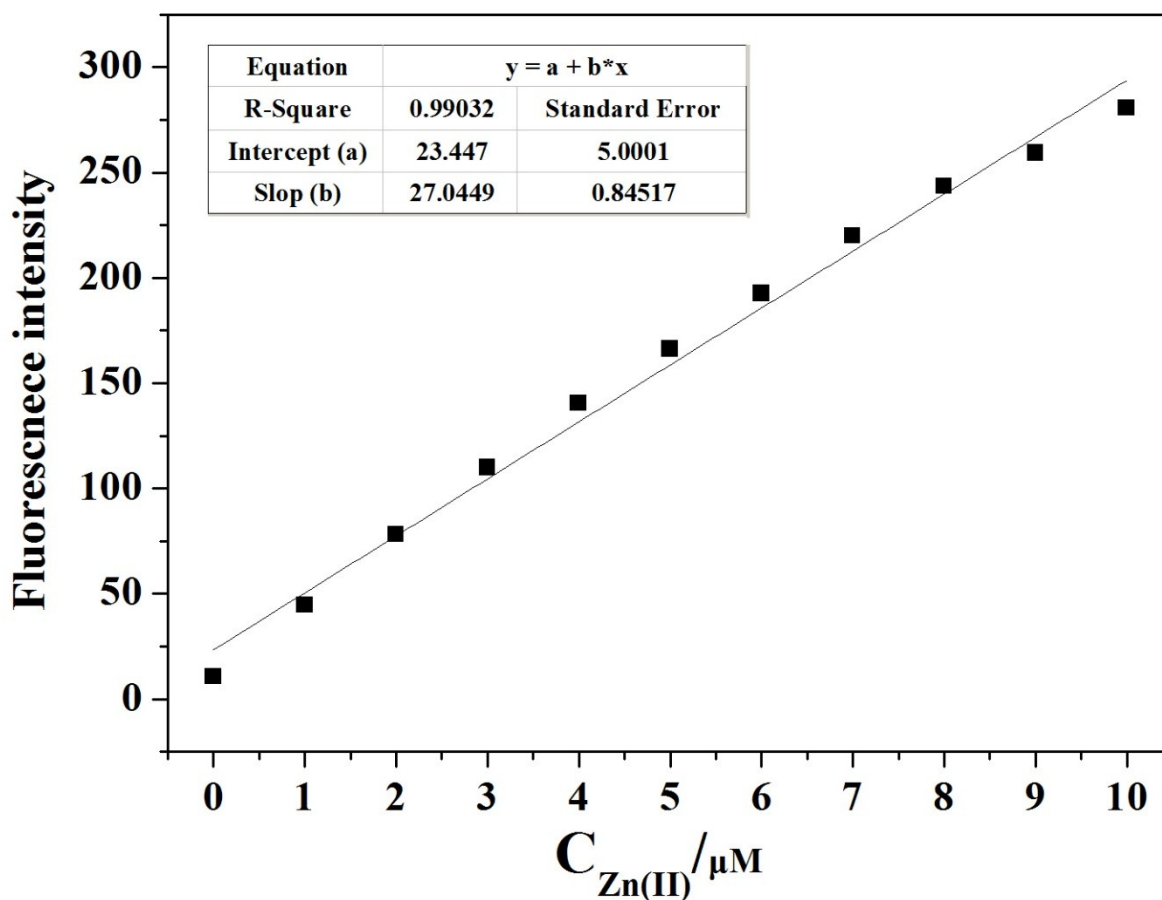

**Fig. S8** Fluorescence intensity (at 521 nm) of **1** as a function of Zn(II) concentration ( $[\mathbf{1}] = 20 \mu\text{mol/L}$  and  $[\text{Zn(II)}] = 1.00\text{-}10.00 \mu\text{mol/L}$ ). Conditions: all samples were conducted in buffer-MeOH solution (999:1, 10 mM bis-tris, pH 7.0).  $\lambda_{\text{ex}}$  and  $\lambda_{\text{em}}$  were 355 and 521 nm, respectively.

(a)

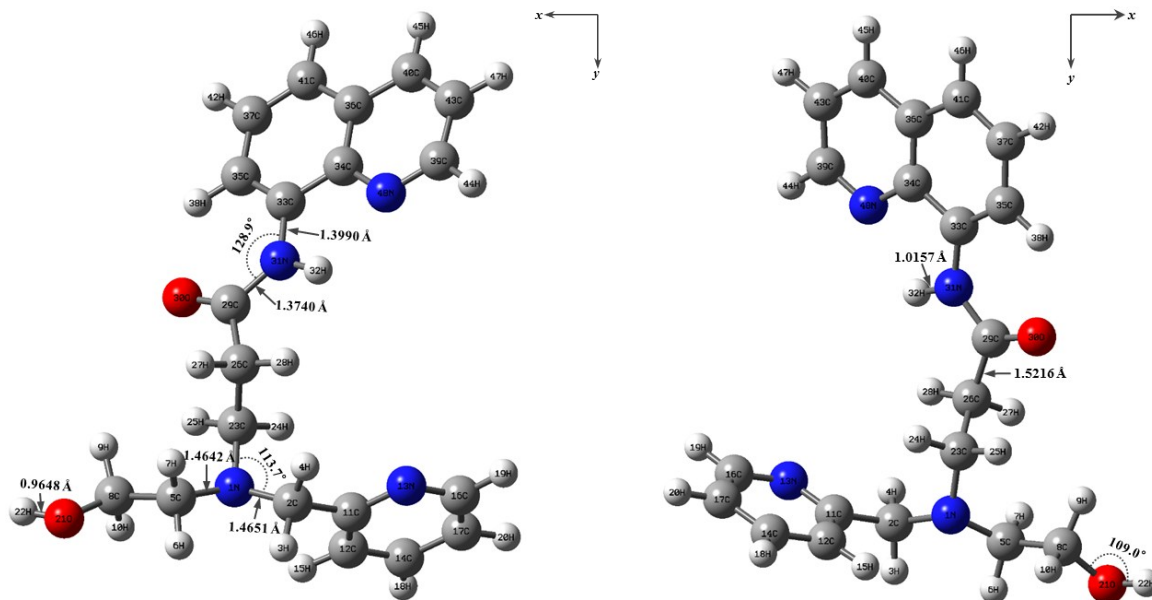

(b)

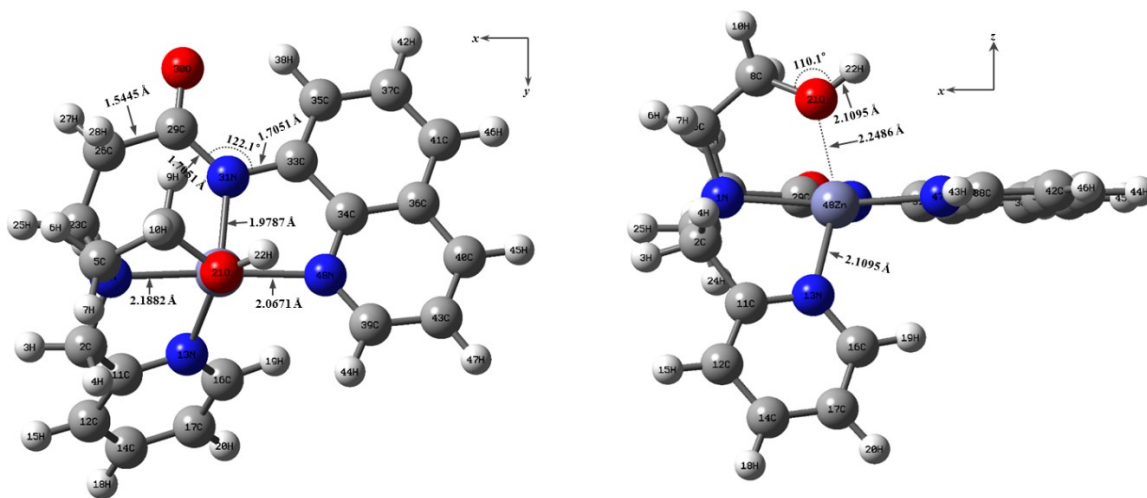

**Fig. S9** Energy-minimized structures for (a) **1** and (b) **1-Zn<sup>2+</sup>** complex. The major bond length and angle are indicated.

(a)

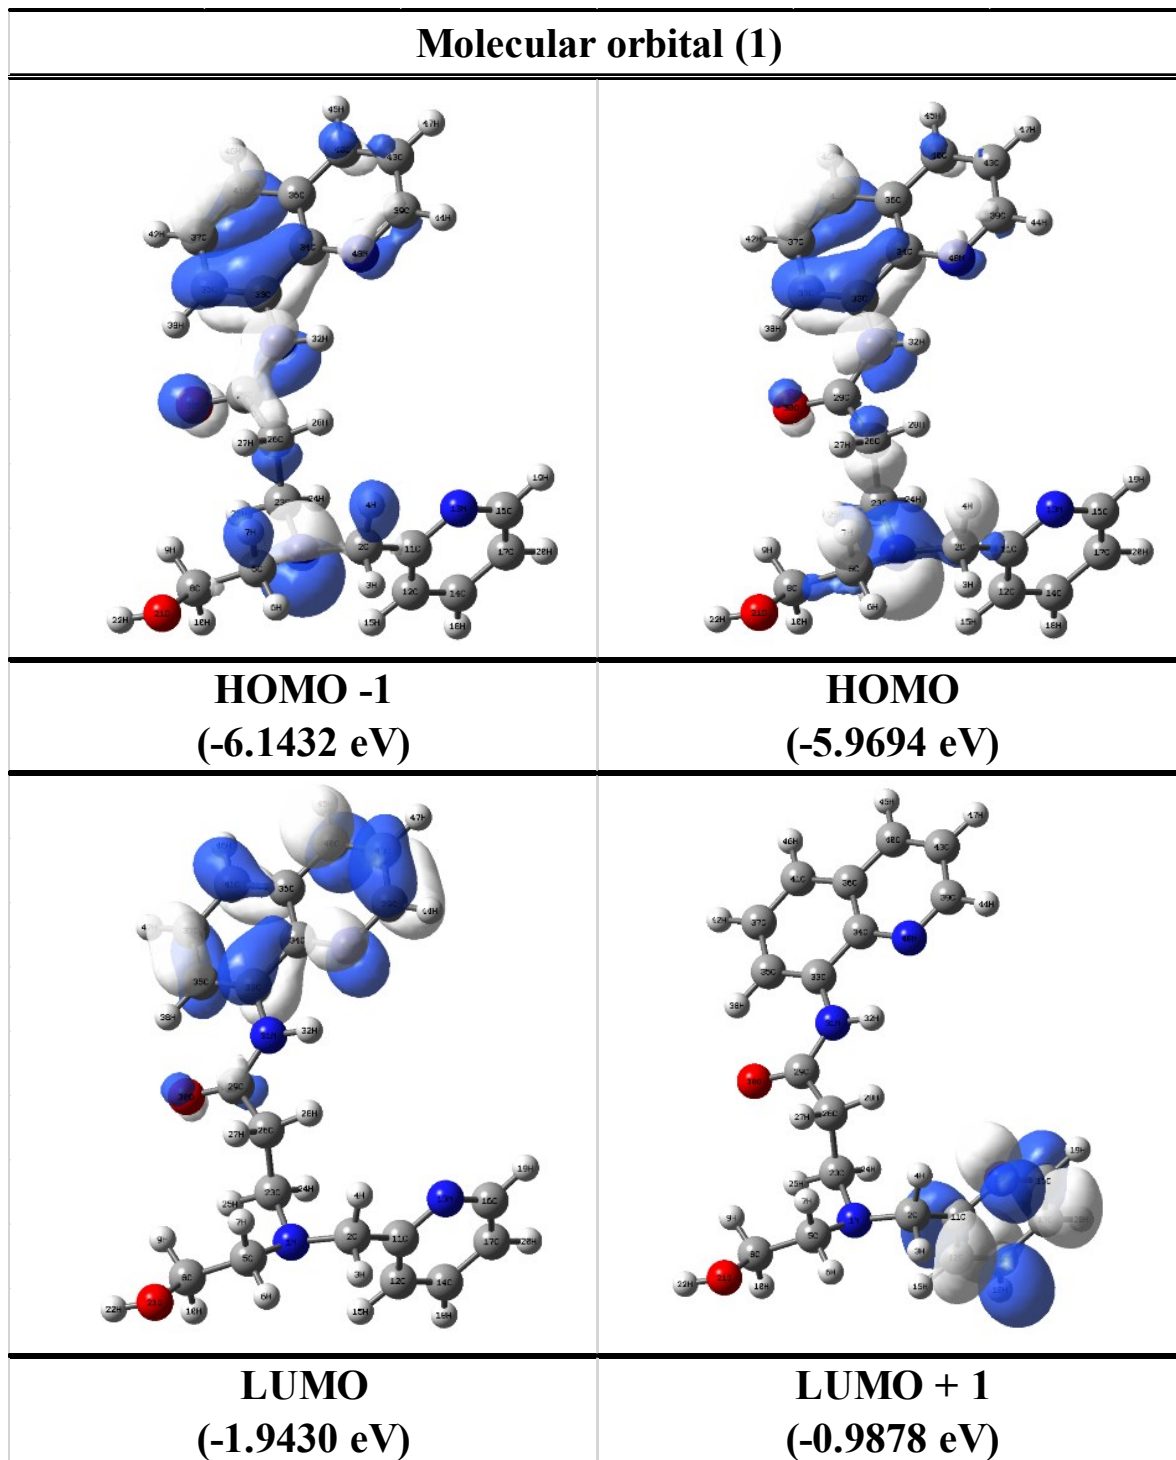

(b)

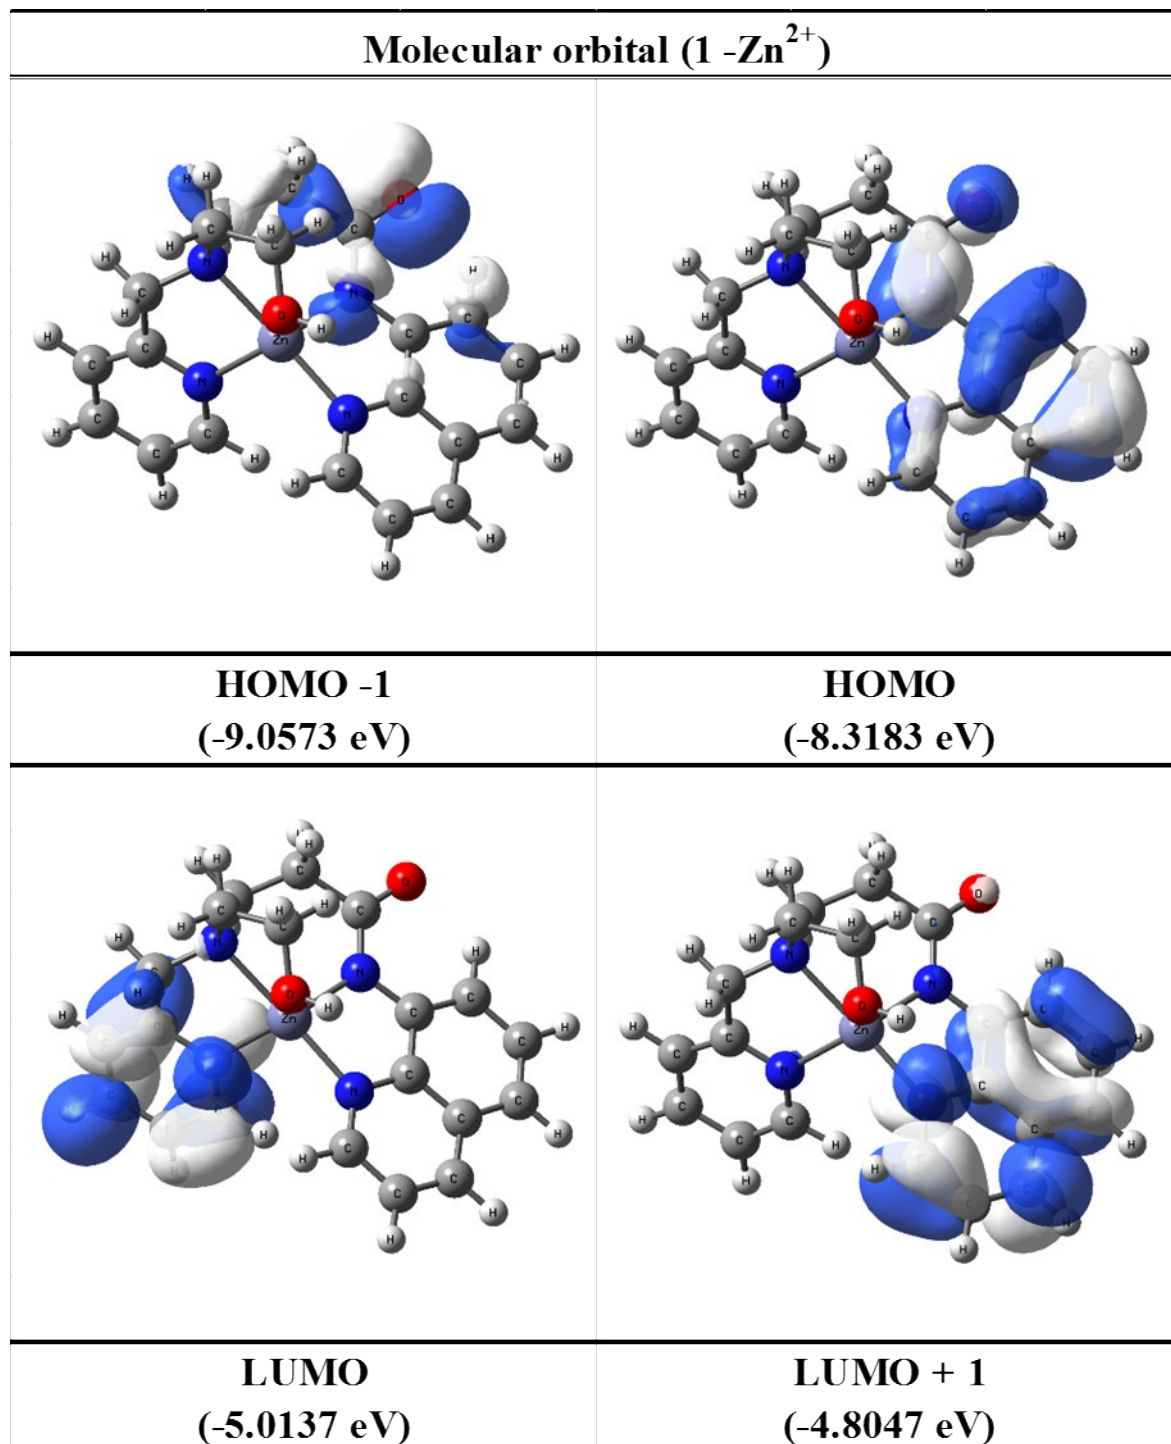

**Fig. S10** The major molecular orbital contours for (a) **1** and (b) **1-Zn<sup>2+</sup>** complex (Isosurface = 0.030 electron bohr<sup>-3</sup>).
